# Supplementary material for: Artificial intelligence algorithm for neoplastic cell percentage estimation and its application to copy number variation in urinary tract cancer
Source: PubMed Central journal article supplement — J Pathol Transl Med. 2024 Aug 9;58(5):229–40. doi: 10.4132/jptm.2024.07.13 (PMC11424195; doi:10.4132/jptm.2024.07.13), 2024-08-09
Supplement: jptm-2024-07-13-Supplementary-Fig-S1.pdf [file jptm-2024-07-13-Supplementary-Fig-S1.pdf]

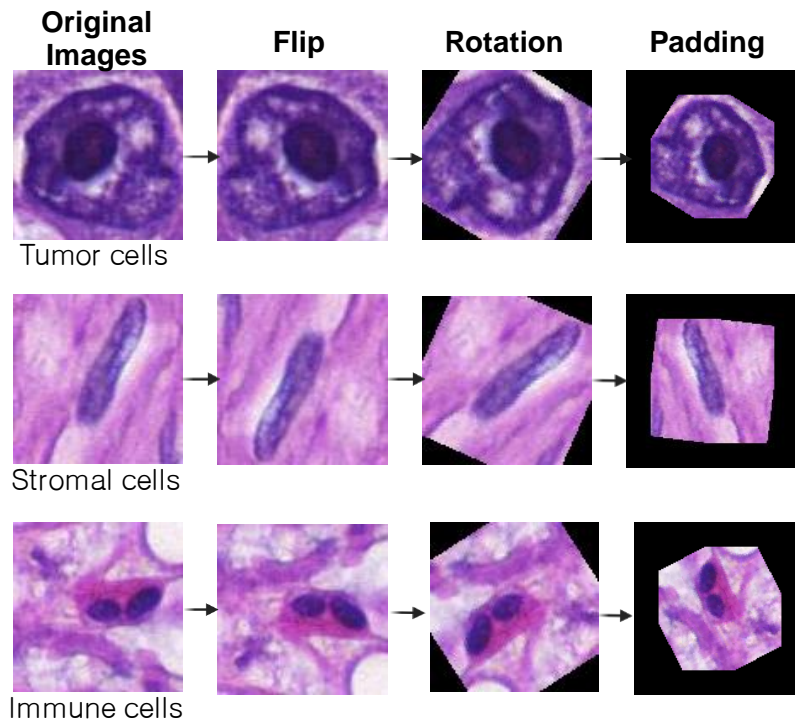

**Supplementary Fig. S1.** Image augmentation techniques (random flipping, rotation, and padding) are applied to tumor cells (upper), stromal cells (middle), and immune cells (lower) to improve the training of the convolutional neural network models.
