# Supplementary material for: Artificial intelligence algorithm for neoplastic cell percentage estimation and its application to copy number variation in urinary tract cancer
Source: PubMed Central journal article supplement — J Pathol Transl Med. 2024 Aug 9;58(5):229–40. doi: 10.4132/jptm.2024.07.13 (PMC11424195; doi:10.4132/jptm.2024.07.13), 2024-08-09
Supplement: jptm-2024-07-13-Supplementary-Fig-S2.pdf [file jptm-2024-07-13-Supplementary-Fig-S2.pdf]

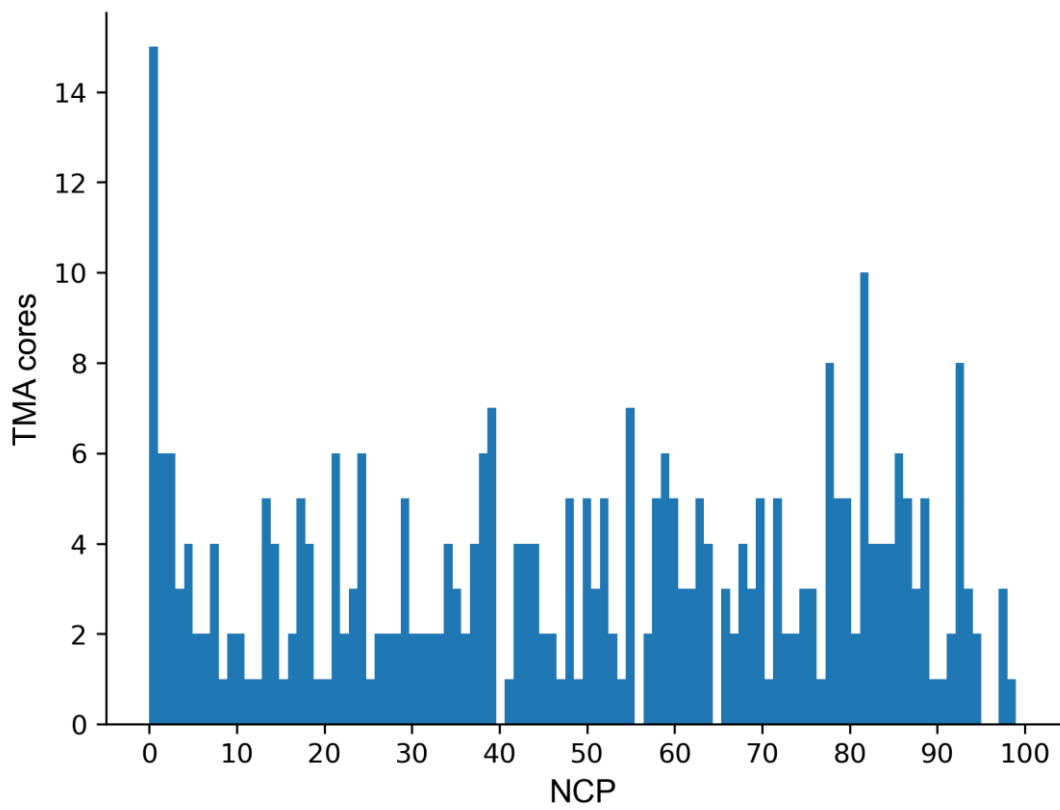

**Supplementary Fig. S2.** Distribution of multiplex immunofluorescence-driven neoplastic cell percentage (NCP) of 335 TMA cores of the validation cohort.
