# Supplementary material for: Artificial intelligence algorithm for neoplastic cell percentage estimation and its application to copy number variation in urinary tract cancer
Source: PubMed Central journal article supplement — J Pathol Transl Med. 2024 Aug 9;58(5):229–40. doi: 10.4132/jptm.2024.07.13 (PMC11424195; doi:10.4132/jptm.2024.07.13), 2024-08-09
Supplement: jptm-2024-07-13-Supplementary-Fig-S3.pdf [file jptm-2024-07-13-Supplementary-Fig-S3.pdf]

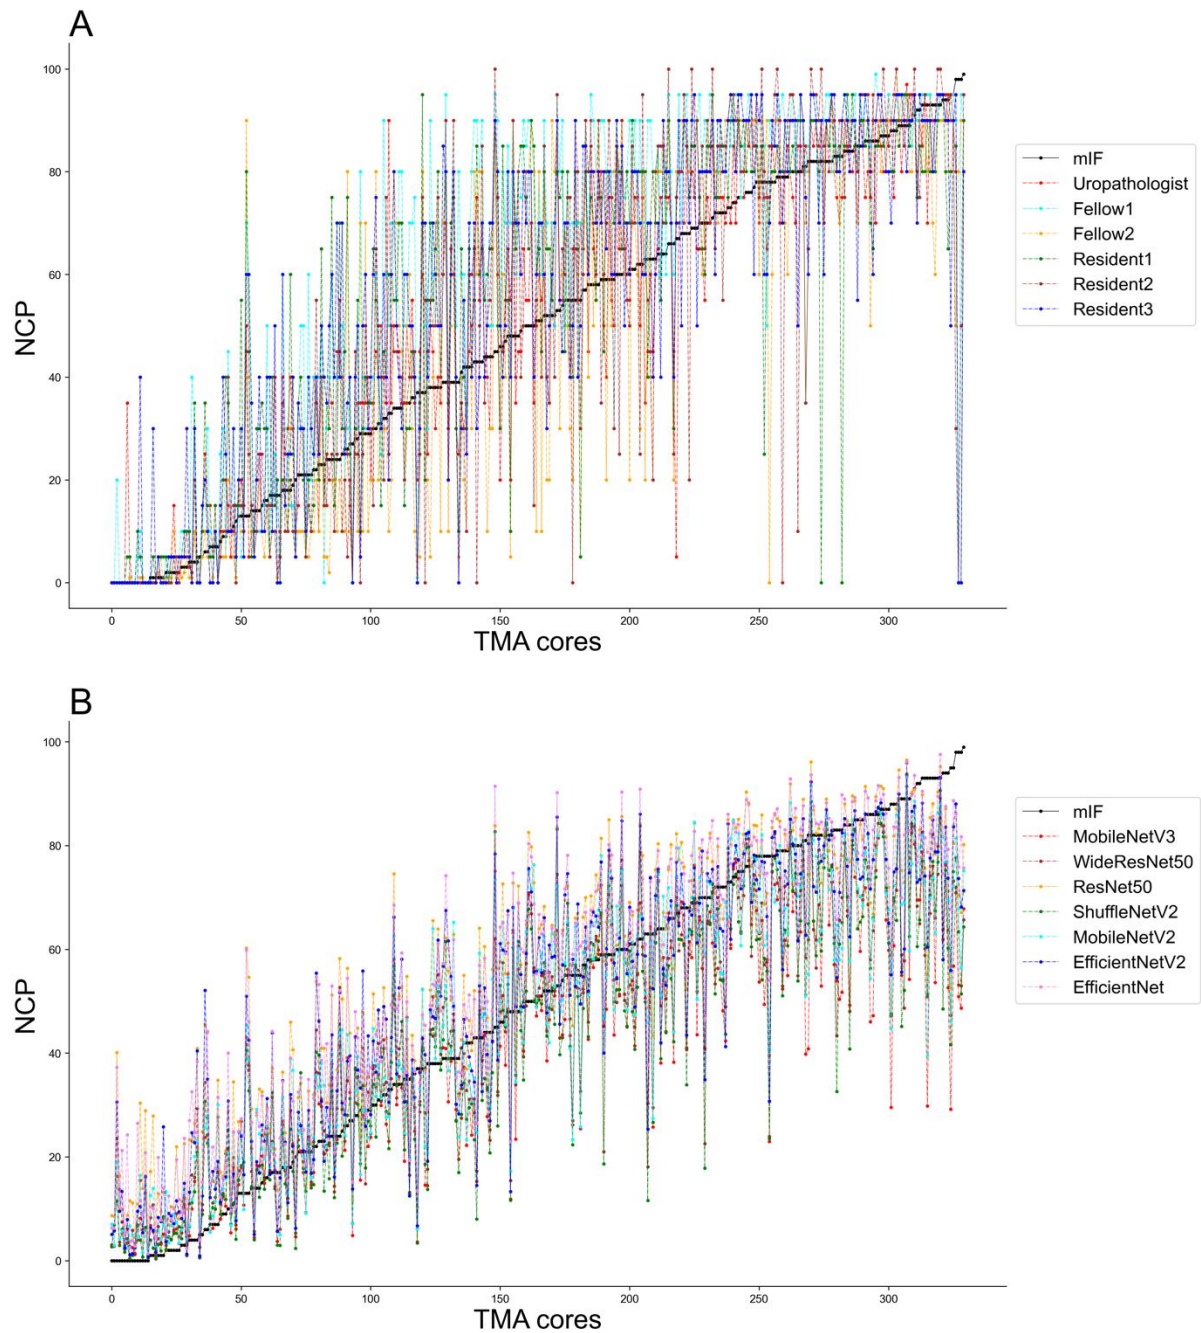

**Supplementary Fig. S3.** Distribution of neoplastic cell percentage (NCP) estimates by 6 individual pathologists (A) and 7 artificial intelligence (AI) models (B) for each tissue microarray (TMA) core. The TMA cores are sorted in ascending order of multiplex immunofluorescence (mIF)–driven NCP. Pathologists’ NCP estimates are more variable at each range of NCP than AI-derived NCP estimates. However, AI models tend to underestimate at higher NCP.
