# Supplementary material for: Artificial intelligence algorithm for neoplastic cell percentage estimation and its application to copy number variation in urinary tract cancer
Source: PubMed Central journal article supplement — J Pathol Transl Med. 2024 Aug 9;58(5):229–40. doi: 10.4132/jptm.2024.07.13 (PMC11424195; doi:10.4132/jptm.2024.07.13), 2024-08-09
Supplement: jptm-2024-07-13-Supplementary-Fig-S5.pdf [file jptm-2024-07-13-Supplementary-Fig-S5.pdf]

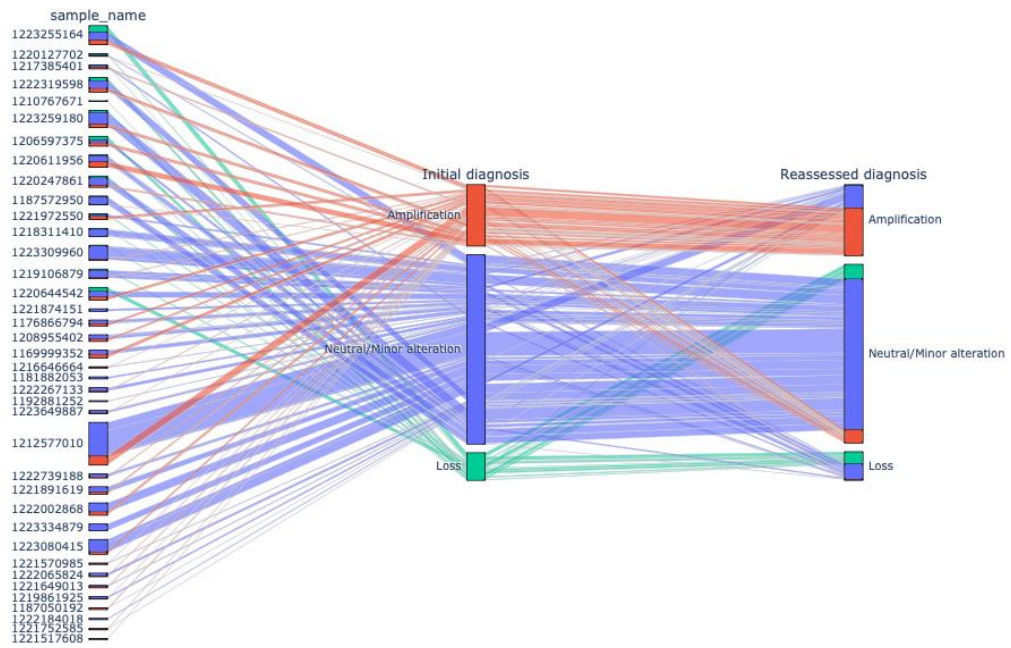

**Supplementary Fig. S5.** A Sankey diagram showing the copy number variation of each case in the application cohort with those at the initial diagnosis (left and middle) and those after incorporation of AI-driven neoplastic cell percentage (right).
