# Supplementary material for: Artificial intelligence algorithm for neoplastic cell percentage estimation and its application to copy number variation in urinary tract cancer
Source: PubMed Central journal article supplement — J Pathol Transl Med. 2024 Aug 9;58(5):229–40. doi: 10.4132/jptm.2024.07.13 (PMC11424195; doi:10.4132/jptm.2024.07.13), 2024-08-09
Supplement: jptm-2024-07-13-Supplementary-Table-S1.pdf [file jptm-2024-07-13-Supplementary-Table-S1.pdf]

**Supplementary Table S1.** A checklist for generating cell patches in order to include various histologic features of urinary tract cancer in the developmental cohort

| <b>Tissue condition</b>     |
|-----------------------------|
| 1. Fixation                 |
| Well-fixed                  |
| Poorly-fixed                |
| 2. Cauterization effect     |
| Present                     |
| Absent                      |
| 3. Focusing                 |
| Well-focused                |
| Partially focused out       |
| 4. Tissue section thickness |
| Thick                       |
| Thin                        |
| 5. Tearing                  |
| Present                     |
| Absent                      |
| 6. Background               |
| Clear                       |
| Hemorrhagic                 |
| Degenerative                |
| Necrotic                    |
| 7. Location                 |
| In tissue                   |
| Floating in the background  |
| 8. Cellularity              |
| High                        |
| Low                         |
| <b>Cancer cells</b>         |
| 1. Cell shape               |
| Round to ovoid              |
| Polygonal                   |
| Spindle                     |
| 2. Cohesiveness             |
| Cohesive                    |
| Overlapping                 |
| Poorly cohesive             |
| 3. Cell membrane            |
| Distinct                    |
| Indistinct                  |
| 4. Mitosis                  |
| Present                     |
| Absent                      |
| 5. Nucleoli                 |
| Prominent                   |
| Inconspicuous               |
| 6. Chromatin                |
| Fine                        |
| Coarse                      |
| Vesicular                   |

|                     |
|---------------------|
| 7. Cytoplasmic hue  |
| Eosinophilic        |
| Amphophilic         |
| Basophilic          |
| Clear               |
| 8. Cytoplasm amount |
| Abundant            |
| Moderate            |
| Scant               |
| <b>Mesenchyme</b>   |
| 1. Location         |
| Intra-tumoral       |
| Peri-tumoral        |
| Extra-tumoral       |
| 2. Structure        |
| Adipose tissue      |
| Muscularis propria  |
| Muscularis mucosae  |
| Large vessel        |
| Small vessel        |
| Papillary core      |
| Nerve               |
| Granulation tissue  |
| 3. Reaction         |
| Desmoplastic        |
| Hyalinized          |
| Myxoid              |
| Edematous           |
| <b>Immune cells</b> |
| 1. Location         |
| Intra-tumoral       |
| Peri-tumoral        |
| Extra-tumoral       |
| 2. Structure        |
| Aggregated          |
| Follicle            |
| 3. Cell type        |
| Neutrophil          |
| Eosinophil          |
| Mature lymphocyte   |
| Histiocyte          |
