# Supplementary material for: Artificial intelligence algorithm for neoplastic cell percentage estimation and its application to copy number variation in urinary tract cancer
Source: PubMed Central journal article supplement — J Pathol Transl Med. 2024 Aug 9;58(5):229–40. doi: 10.4132/jptm.2024.07.13 (PMC11424195; doi:10.4132/jptm.2024.07.13), 2024-08-09
Supplement: jptm-2024-07-13-Supplementary-Table-S2.pdf [file jptm-2024-07-13-Supplementary-Table-S2.pdf]

**Supplementary Table S2.** Total immunophenotyped cells by mIF

| Immunophenotype | Cell counts | Percentage (%) |
|-----------------|-------------|----------------|
| CK+/CD45-/aSMA- | 863,531     | 40.7           |
| CK-/CD45+/aSMA- | 577,724     | 27.2           |
| CK-/CD45-/aSMA+ | 455,225     | 21.5           |
| CK+/CD45+/aSMA- | 20,299      | 1.0            |
| CK+/CD45+/aSMA+ | 56          | 0.0            |
| CK+/CD45-/aSMA+ | 9,035       | 0.4            |
| CK-/CD45+/aSMA+ | 145,584     | 6.9            |
| CK-/CD45-/aSMA- | 48,559      | 2.3            |
| Total           | 2,120,013   | 100            |

mIF, multiplex immunofluorescence; CK, cytokeratin; SMA, smooth muscle actin.
