# Supplementary material for: Artificial intelligence algorithm for neoplastic cell percentage estimation and its application to copy number variation in urinary tract cancer
Source: PubMed Central journal article supplement — J Pathol Transl Med. 2024 Aug 9;58(5):229–40. doi: 10.4132/jptm.2024.07.13 (PMC11424195; doi:10.4132/jptm.2024.07.13), 2024-08-09
Supplement: jptm-2024-07-13-Supplementary-Table-S3.pdf [file jptm-2024-07-13-Supplementary-Table-S3.pdf]

**Supplementary Table S3.** Possible causes of underestimation of the AI Models in TMA cores with a high NCP ( $\geq 60\%$ )

| Possible causes                 | Core counts | Percentage (%) |
|---------------------------------|-------------|----------------|
| Nuclear spindling               | 27          | 19.9           |
| Nuclear degeneration (pyknosis) | 22          | 16.2           |
| Abundant cytoplasm              | 6           | 4.4            |
| Mixed <sup>a</sup>              | 4           | 2.9            |
| Cauterization                   | 3           | 2.2            |
| Unremarkable                    | 74          | 54.4           |
| Total                           | 136         | 100            |

AI, artificial intelligence; TMA, tissue microarrays; NCP, neoplastic cell percentage.

<sup>a</sup>Three cores showed both features of nuclear degeneration (pyknosis) and spindling. One core showed both features of abundant cytoplasm and nuclear spindling.
