# Supplementary material for: Artificial intelligence algorithm for neoplastic cell percentage estimation and its application to copy number variation in urinary tract cancer
Source: PubMed Central journal article supplement — J Pathol Transl Med. 2024 Aug 9;58(5):229–40. doi: 10.4132/jptm.2024.07.13 (PMC11424195; doi:10.4132/jptm.2024.07.13), 2024-08-09
Supplement: jptm-2024-07-13-Supplementary-Table-S4.pdf [file jptm-2024-07-13-Supplementary-Table-S4.pdf]

**Supplementary Table S4.** Agreement between pathologist and AI-driven NCP on mIF-driven NCP according to histological variation

|                    | ICC (95% CI)                                                          |                                                                    |                                |
|--------------------|-----------------------------------------------------------------------|--------------------------------------------------------------------|--------------------------------|
|                    | Urothelial carcinoma without divergent differentiation/subtype (n=56) | Urothelial carcinoma with divergent differentiation/subtype (n=57) | Non-urothelial carcinoma (n=5) |
| <b>Pathologist</b> |                                                                       |                                                                    |                                |
| Uropathologist     | 0.91 (0.87 to 0.93)                                                   | 0.94 (0.91 to 0.95)                                                | 0.75 (0.39 to 0.91)            |
| Fellow 1           | 0.83 (0.59 to 0.91)                                                   | 0.78 (0.48 to 0.89)                                                | 0.67 (0.13 to 0.89)            |
| Fellow 2           | 0.83 (0.77 to 0.87)                                                   | 0.84 (0.79 to 0.88)                                                | 0.61 (0.17 to 0.85)            |
| Resident 1         | 0.82 (0.65 to 0.89)                                                   | 0.76 (0.69 to 0.82)                                                | 0.77 (0.20 to 0.93)            |
| Resident 2         | 0.84 (0.79 to 0.88)                                                   | 0.84 (0.79 to 0.88)                                                | 0.63 (0.20 to 0.86)            |
| Resident 3         | 0.83 (0.70 to 0.89)                                                   | 0.80 (0.72 to 0.85)                                                | 0.64 (0.17 to 0.87)            |
| <b>AI model</b>    |                                                                       |                                                                    |                                |
| EfficientNet       | 0.89 (0.81 to 0.93)                                                   | 0.89 (0.67 to 0.95)                                                | 0.62 (0.18 to 0.86)            |
| EfficientNetV2     | 0.88 (0.83 to 0.91)                                                   | 0.90 (0.85 to 0.93)                                                | 0.60 (0.12 to 0.85)            |
| MobileNetV2        | 0.88 (0.84 to 0.91)                                                   | 0.90 (0.87 to 0.93)                                                | 0.44 (-0.12 to 0.78)           |
| MobileNetV3        | 0.81 (0.65 to 0.89)                                                   | 0.87 (0.80 to 0.91)                                                | 0.33 (-0.18 to 0.71)           |
| ResNet             | 0.87 (0.80 to 0.92)                                                   | 0.87 (0.65 to 0.93)                                                | 0.48 (-0.0 to 0.79)            |
| WideResNet         | 0.85 (0.78 to 0.90)                                                   | 0.90 (0.86 to 0.92)                                                | 0.55 (0.05 to 0.8)             |
| ShuffleNetV2       | 0.83 (0.68 to 0.90)                                                   | 0.89 (0.84 to 0.92)                                                | 0.54 (0.03 to 0.82]            |

AI, artificial intelligence; NCP, neoplastic cell percentage; mIF, multiplex immunofluorescence; ICC, intraclass correlation coefficient; CI, confidence interval.
